# Supplementary material
Source: publisher site journal article supplement (https://www.dovepress.com/get_supplementary_file.php?f=271810.docx)
Supplement: Supplementary file 1 [file get_supplementary_file.php]

Supplement

Figure 1 Distribution of AAT alleles among the chronic respiratory diseases: COPD and emphysema

**

**

(§ significant between bronchiectasis and COPD/emphysema; p<0.001 §§§)

Supplement

Figure 2 Frequency of symptoms among the chronic respiratory diseases: COPD and Emphysema





(§ significant between bronchiectasis and COPD/emphysema; p<0.05 §)
